# Supplementary material for: A Map of Copy Number Variations in Chinese Populations
Source: PubMed Central journal article supplement (PMC3210162; doi:10.1371/journal.pone.0027341), 2011-11-07

chr1:554484-840550

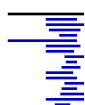

chr1:1617778-1750923

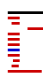

chr1:12743662-13379464

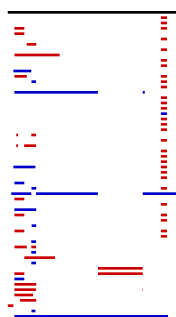

chr1:16741950-17150527

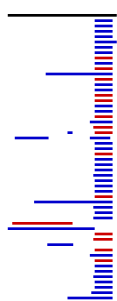

chr1:17857036-18485275

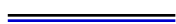

chr1:25434674-25535931

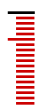

chr1:60888686-61041374

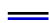

chr1:65630676-65999483

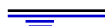

chr1:103526436-103819266

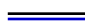

chr1:103910761-104128012

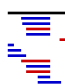

chr1:105835455-106057949

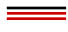

chr1:119490013-119780209

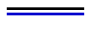

chr1:142693888-143049286

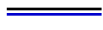

chr1:144337063-144724627

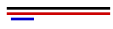

chr1:146780414-147788470

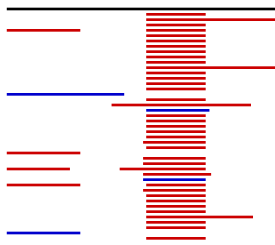

chr1:159763524-159906183

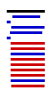

chr1:187106397-187350656

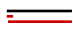

chr1:187592364-187814261

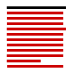

chr1:194997658-195183422

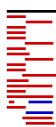

chr1:241334731-241457448

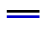

chr2:7135336-7340939

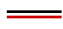

chr2:13455187-13908456

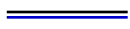

chr2:13964040-14252587

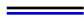

chr2:87104007-87805782

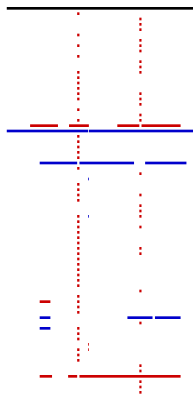

chr2:89395525-89912071

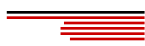

chr2:97094860-97391786

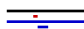

chr2:110147004-110603665

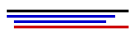

chr2:116257824-116391820

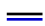

chr2:130660292-130874329

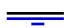

chr2:216861288-217162631

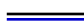

chr2:232901812-233018302

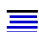

chr3:20310916-20882646

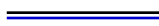

chr3:20949623-21095913

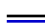

chr3:28307024-28438601

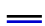

chr3:49346010-49489741

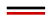

chr3:50317228-50523899

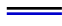

chr3:68614345-68990246

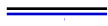

chr3:125782638-126494752

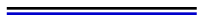

chr3:163995351-164109297

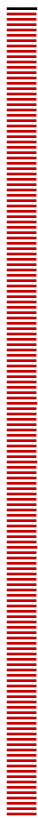

chr3:196964365-197137370

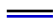

chr4:58821-212068

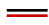

chr4:22293290-22405586

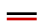

chr4:29159382-29309515

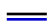

chr4:45619591-45891135

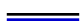

chr4:56879617-57069085

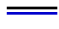

chr4:57194023-57392352

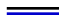

chr4:64918291-65128774

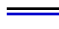

chr4:69043083-69204004

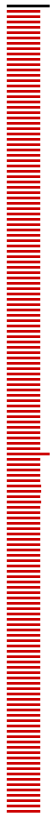

chr4:70162233-70298973

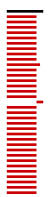

chr4:87910022-88097650

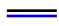

chr4:99279567-99383896

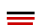

chr4:145140024-145252346

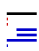

chr4:152053479-152252680

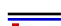

chr4:178204460-178379530

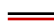

chr4:190384723-190701251

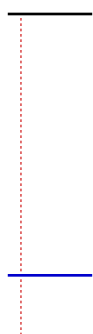

chr4:191146321-191261904

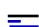

chr5:751371-886627

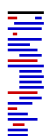

chr5:13226664-13421282

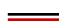

chr5:45789691-45916139

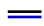

chr5:46227005-46349398

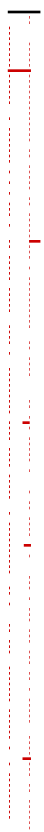

chr5:107598684-107834240

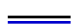

chr5:107878643-108109865

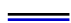

chr5:149562665-149684402

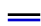

chr5:164273821-164424234

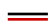

chr5:178662194-178863916

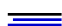

chr6:198272-332659

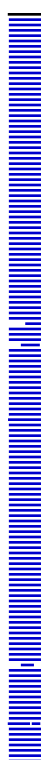

chr6:26220383-26413386

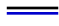

chr6:32539530-32681749

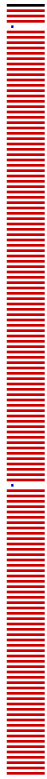

chr6:58248259-58882675

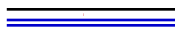

chr6:81705925-81878449

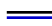

chr6:95330385-95590059

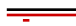

chr6:162449123-162953768

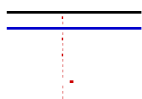

chr7:71798-326228

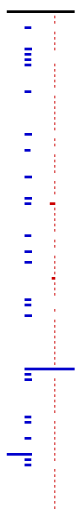



chr7:5293964-5469490

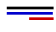

chr7:19379124-19511836

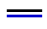

chr7:19619636-19978999

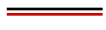

chr7:53433670-53558241

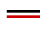

chr7:62315457-62467318

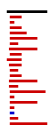

chr7:63396930-63500236

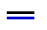

chr7:63508459-63622160

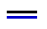

chr7:64231500-64605202

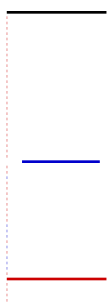

chr7:73141429-73355380

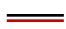

chr7:74998062-75192118

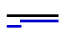

chr7:75202175-75373301

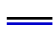

chr7:76163693-76439521

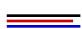

chr7:96039672-96178245

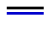

chr7:110719406-110900827

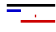

chr7:112096428-112232697

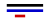

chr7:113037047-113216830

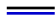

chr7:113220076-113528731

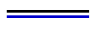

chr7:142929090-143203219

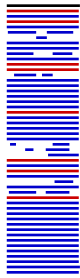

chr7:143527185-143697880

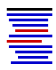

chr7:149190618-149425987

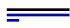

chr7:151477446-151580599

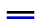

chr7:153130910-153302383

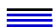

chr8:2113807-2382517

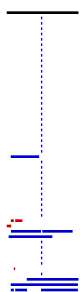

chr8:3674807-3777514

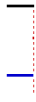

chr8:6891605-6998485

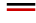

chr8:7157884-8055448

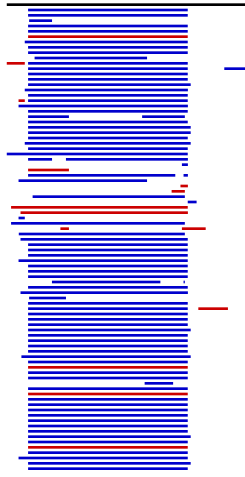

chr8:12225652-12536010

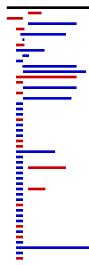

chr8:18846542-18953095

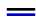

chr8:19035043-19160673

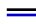

chr8:35813728-36497057

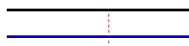

chr8:39349340-39508281

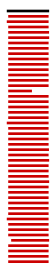

chr8:53428165-53715799

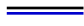

chr8:83489145-83705565

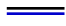

chr8:112064480-112212410

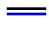

chr8:121483185-121867498

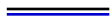

chr8:142582575-142707176

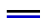

chr8:146165959-146268959

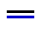

chr9:11998577-12138728

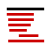

chr9:13215407-13508433

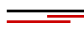

chr9:30327953-30514025

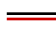

chr9:38994848-39191451

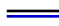

chr9:39232277-39800645

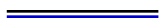

chr9:40466154-40901224

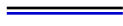

chr9:43255666-44795733

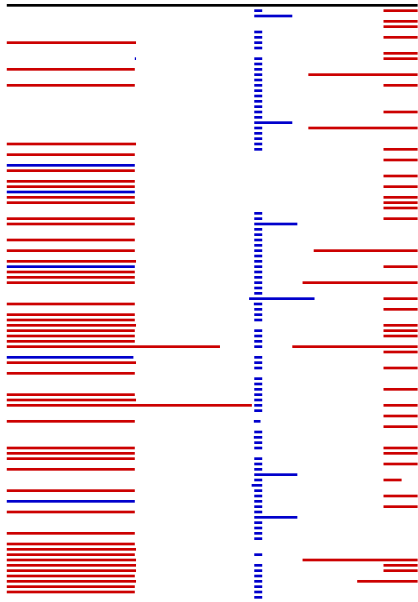

chr9:45270026-45953932

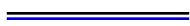

chr9:68055004-68890044

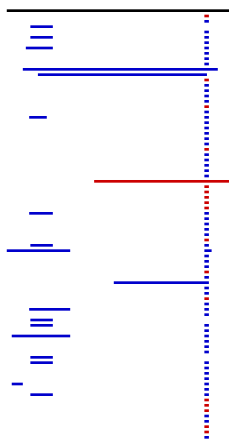

chr9:68905449-69114783

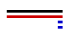

chr9:69114784-69267842

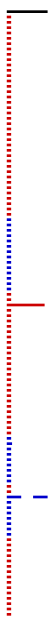

chr9:79934142-80339907

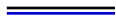

chr9:118291339-118421106

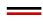

chr10:180384-292648

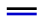

chr10:861038-1091044

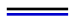

chr10:41753546-42259374

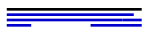

chr10:46111165-47241036

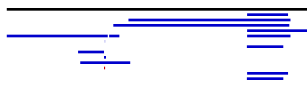

chr10:59242014-59441474

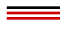

chr10:62076611-62177209

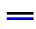

chr10:66363458-66503261

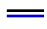

chr10:67650978-67756487

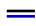

chr10:67838185-68185158

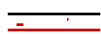

chr10:81475459-81593474

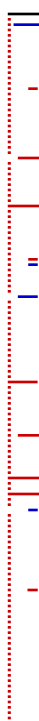

chr10:88987279-89098396

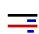

chr10:135092863-135227268

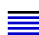

chr10:135250508-135356694

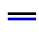

chr11:4206589-4315864

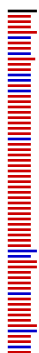

chr11:50952568-51185373

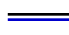

chr11:51231886-51421003

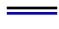

chr11:54530469-54796378

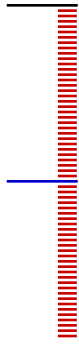

chr11:66879237-66993741

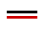

chr11:67239223-67488890

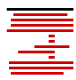

chr11:96783683-97433009

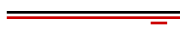

chr11:106558245-106732690

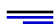

chr11:129034292-129168247

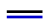

chr12:7895692-8028989

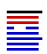

chr12:9496442-9626237

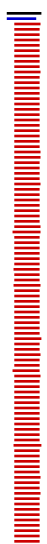



chr12:20652661-20785273

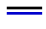

chr12:20793555-21078914

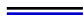

chr12:62219230-62422921

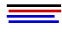

chr12:65622693-65806729

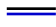

chr12:86502634-86639183

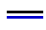

chr12:122406526-122552874

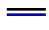

chr13:18041824-18165293

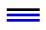

chr13:56610801-56786968

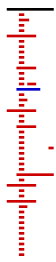

chr13:64890871-65055390

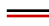

chr14:18072124-18195701

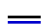

chr14:18452209-19494766

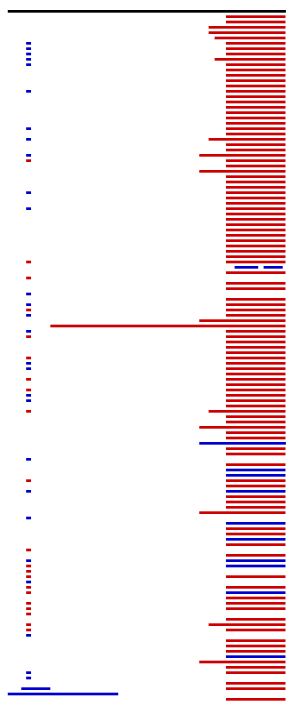

chr14:47449986-47725196

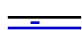

chr14:105100682-105295569

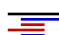

chr14:105609107-105854089

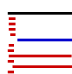

chr15:18506386-20232439

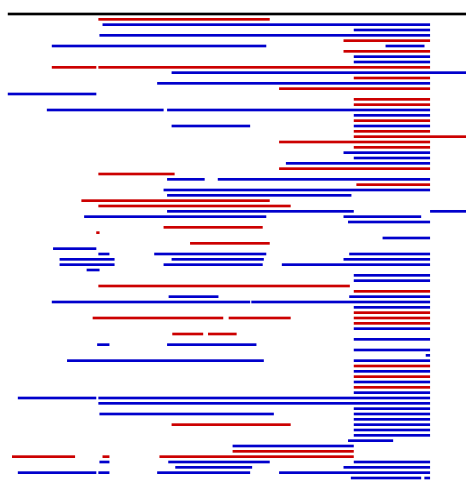

chr15:22071426-22329508

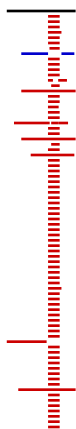

chr15:28173703-28609050

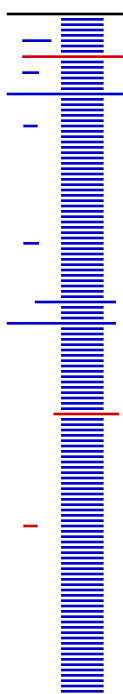

chr15:28688170-28875769

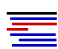

chr15:29798781-30231488

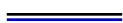

chr15:30318608-30647150

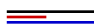

chr15:32459378-32650015

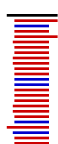

chr15:41672410-41783180

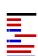

chr15:88433614-88579397

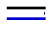

chr16:470380-593863

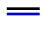

chr16:2530025-2681813

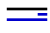

chr16:14796096-15023758

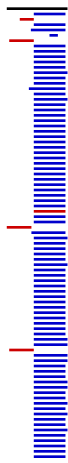

chr16:16260667-16706164

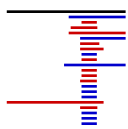

chr16:18336886-18675619

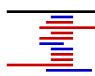

chr16:21270906-21513685

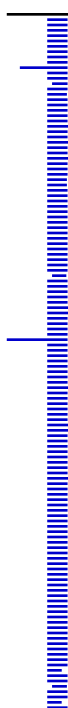

chr16:21526249-21650633

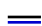

chr16:22349475-22465432

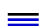

chr16:22465433-22620480

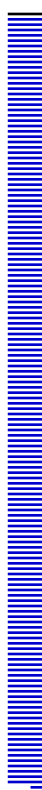

chr16:30134444-30419276

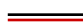

chr16:31873117-33208394

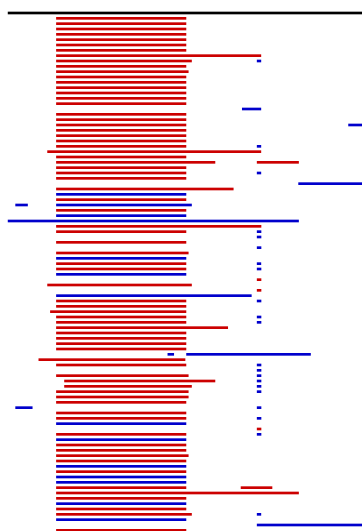

chr16:33208395-33683586

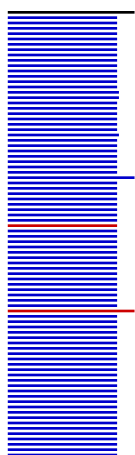

chr16:34324072-34614568

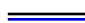

chr16:68607297-68770545

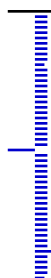

chr16:76011878-76174547

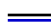

chr16:76188266-76412349

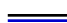

chr16:76435072-76637919

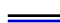

chr16:76645062-77052862

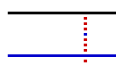

chr17:4157041-4326327

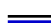

chr17:18296117-18415371

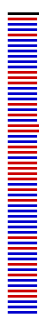

chr17:18876248-19070824

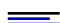

chr17:21272823-21470495

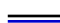

chr17:21473462-21859450

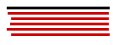

chr17:31459625-31610407

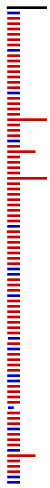

chr17:41521619-41719991

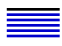

chr17:41750187-42143377

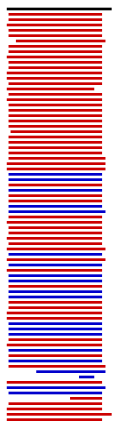

chr17:68480897-68633353

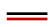

chr18:14157402-14342869

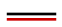

chr18:14574147-14731650

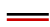

chr19:918584-1028701

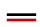

chr19:2356116-2510841

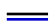

chr19:10161930-10346581

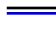

chr19:14374781-14523408

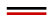

chr19:20386147-20513302

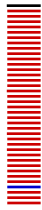

chr19:22128734-22999226

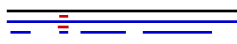

chr19:47978604-48482591

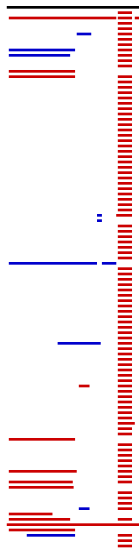

chr19:52437315-52551397

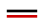

chr20:28034013-28151003

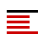

chr21:9758742-10197783

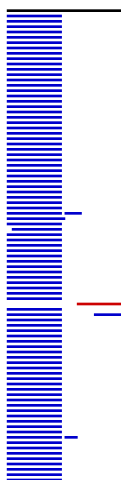



chr21:13374733-13483809

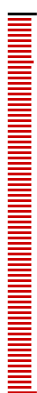

chr21:16472786-16662257

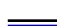

chr22:14482342-15037301

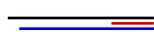

chr22:17173947-17386125

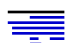

chr22:20055998-20175294

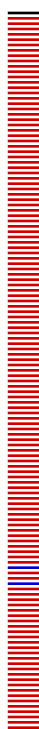

chr22:20645089-20903987

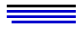

chr22:22613016-22732736

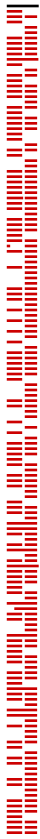

chr22:23993985-24311016

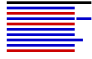

chr22:35111626-35215598

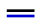

chr22:44212317-44661555

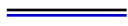

chr22:45039250-45191270

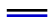

chr22:46467265-46652642

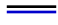

LOSS

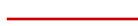

GAIN

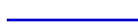

Supplement: pone.0027341.s007.pdf [file pone.0027341.s007.pdf]
