# Supplementary material for: A Map of Copy Number Variations in Chinese Populations
Source: PubMed Central journal article supplement (PMC3210162; doi:10.1371/journal.pone.0027341), 2011-11-07
Supplement: pone.0027341.s001.pdf [file pone.0027341.s001.pdf]

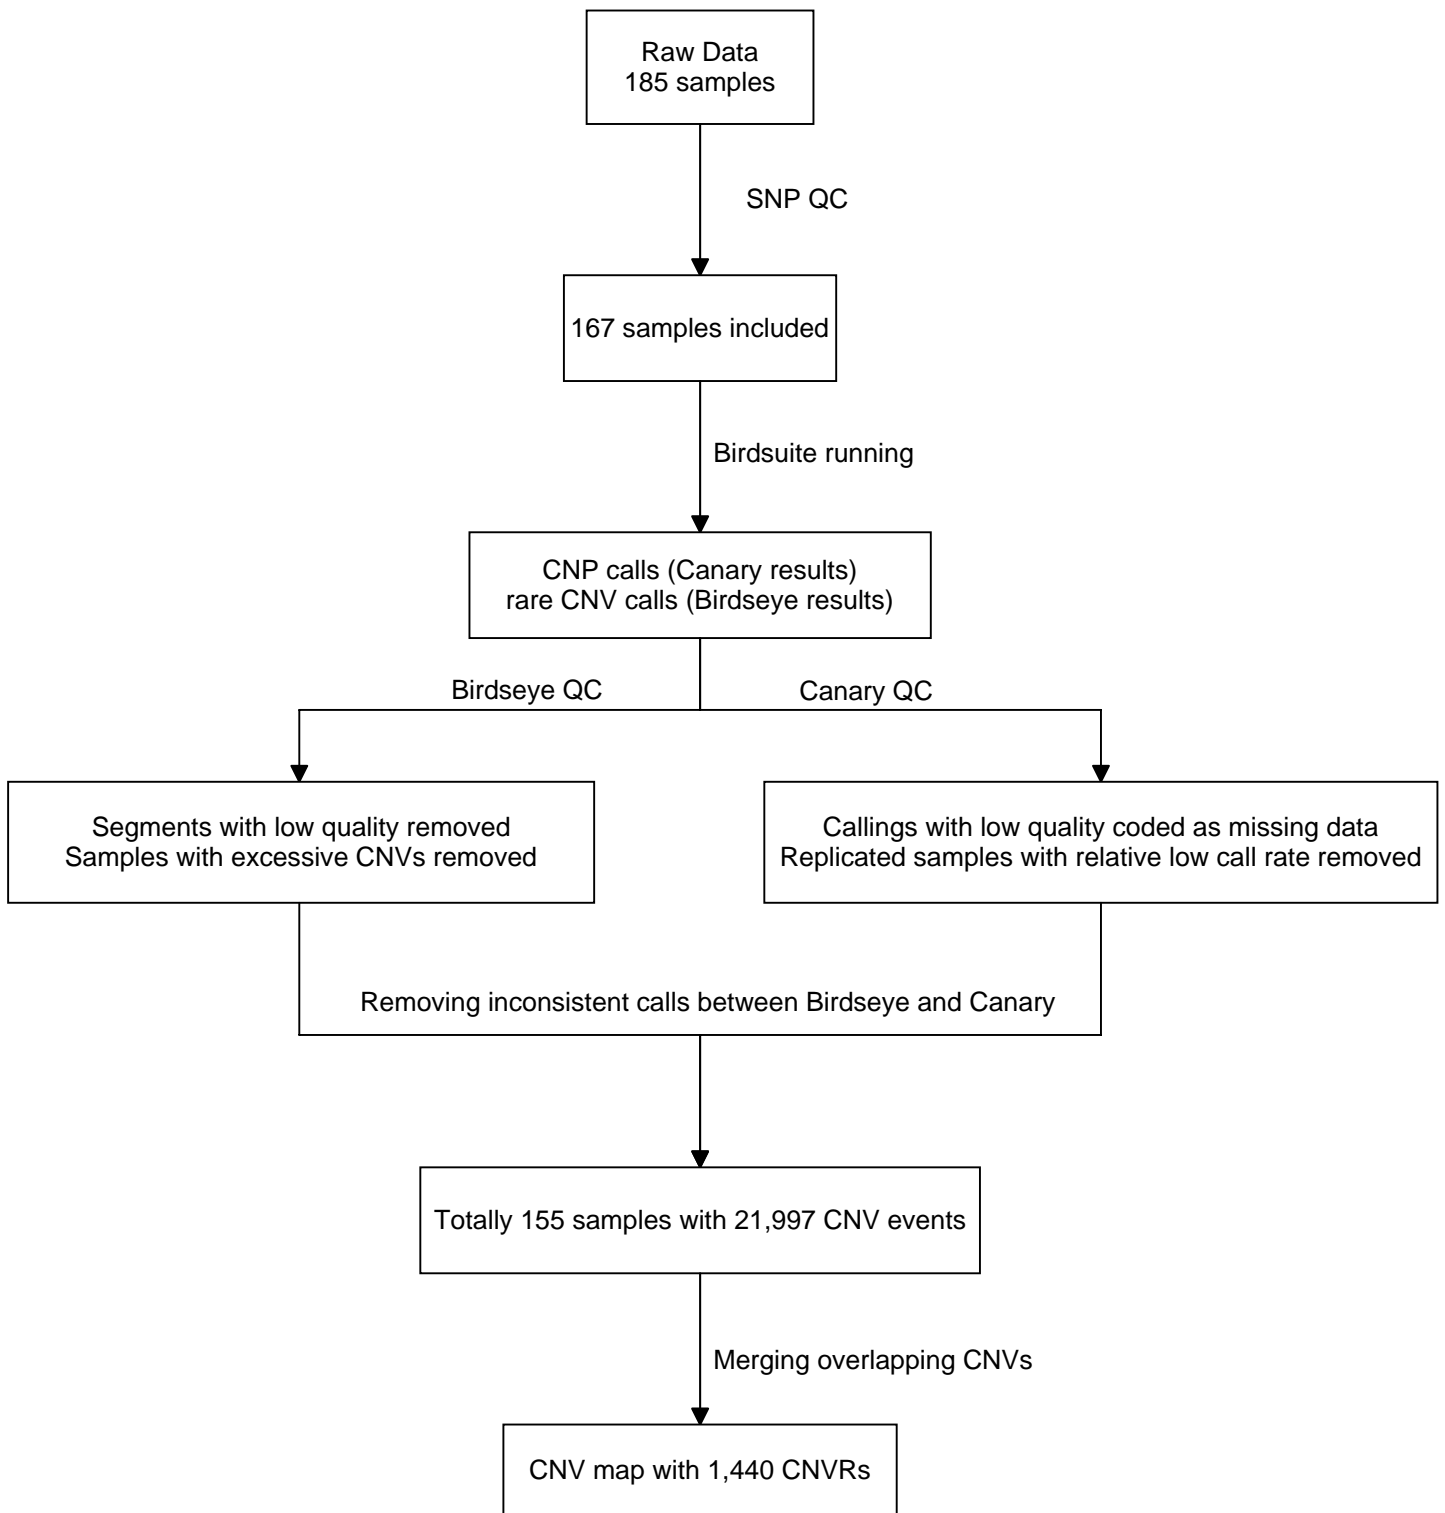

| QC filter                                                                  |                                                  |                                                                                                                                         |
|----------------------------------------------------------------------------|--------------------------------------------------|-----------------------------------------------------------------------------------------------------------------------------------------|
| SNP                                                                        | Canary                                           | Birdseye                                                                                                                                |
| The samples with calling rate <0.86 were removed after running apt-geno-qc | Callings with confidence $\geq 0.1$ were removed | Segments which did not meet the following criterias were removed:<br>LOD score $\geq 5$<br>number of markers $\geq 3$<br>size <1,000 bp |
