# Supplementary material for: A Map of Copy Number Variations in Chinese Populations
Source: PubMed Central journal article supplement (PMC3210162; doi:10.1371/journal.pone.0027341), 2011-11-07

## CNV length distribution

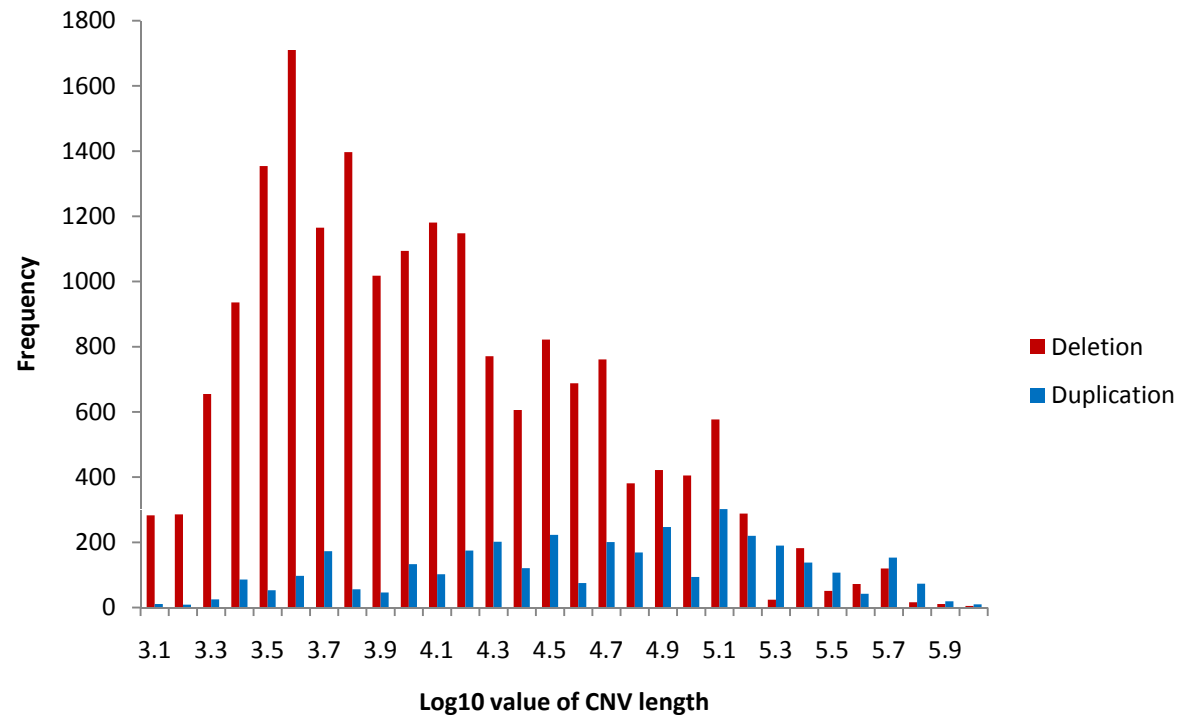

Supplement: pone.0027341.s002.pdf [file pone.0027341.s002.pdf]
