# Supplementary material for: A Map of Copy Number Variations in Chinese Populations
Source: PubMed Central journal article supplement (PMC3210162; doi:10.1371/journal.pone.0027341), 2011-11-07
Supplement: pone.0027341.s008.pdf [file pone.0027341.s008.pdf]

A.

|                       |    |                 |
|-----------------------|----|-----------------|
| <b>African</b><br>943 |    |                 |
| 62                    | 85 | 80              |
| 654<br>Asian          | 45 | 697<br>European |

B.

|                            |     |                 |
|----------------------------|-----|-----------------|
| <b>Han Chinese</b><br>165  |     |                 |
| 41                         | 159 | 25              |
| 185<br>Chinese<br>Minority | 32  | 178<br>Japanese |

C.

|                       |    |                 |
|-----------------------|----|-----------------|
| <b>African</b><br>409 |    |                 |
| 57                    | 45 | 52              |
| 483<br>Asian          | 50 | 459<br>European |

D.

|                            |    |                 |
|----------------------------|----|-----------------|
| <b>Han Chinese</b><br>146  |    |                 |
| 26                         | 32 | 18              |
| 142<br>Chinese<br>Minority | 19 | 155<br>Japanese |

E.

|                      |     |                |
|----------------------|-----|----------------|
| <b>African</b><br>53 |     |                |
| 140                  | 680 | 145            |
| 26<br>Asian          | 78  | 26<br>European |

F.

|                          |     |               |
|--------------------------|-----|---------------|
| <b>Han Chinese</b><br>10 |     |               |
| 27                       | 229 | 18            |
| 8<br>Chinese<br>Minority | 21  | 6<br>Japanese |
